# Supplementary material for: Islands within an island: Population genetic structure of the endemic Sardinian newt, Euproctus platycephalus
Source: PubMed Central journal article supplement (PMC5306002; doi:10.1002/ece3.2665), 2017-01-25
Supplement: ECE3-7-1190-s001.pdf [file ECE3-7-1190-s001.pdf]

**Figure S1**

**A**

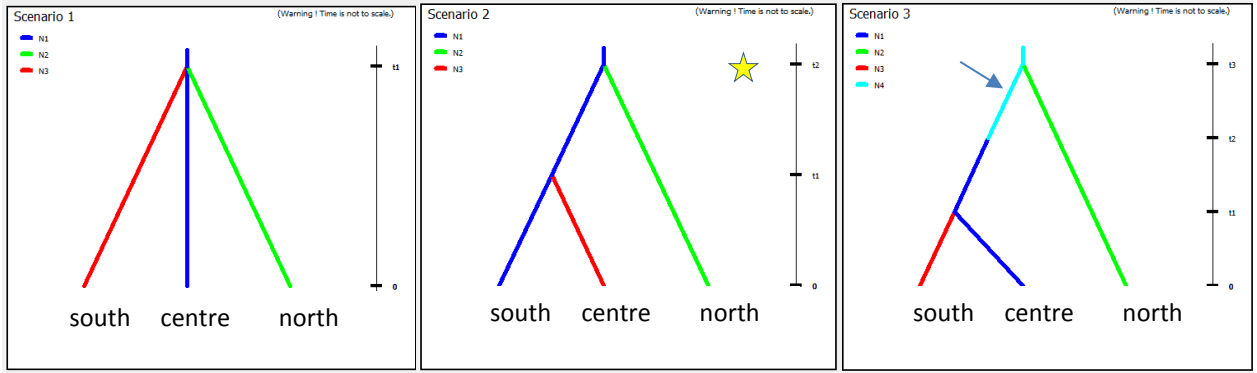

**B**

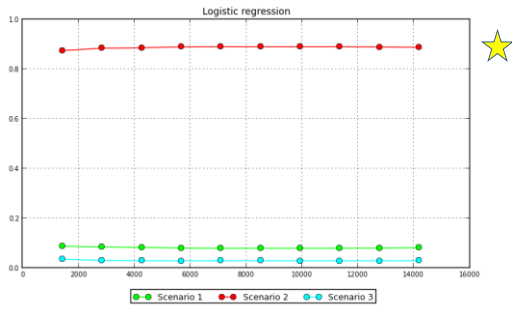

confidence in scenario choice

|       |         |       |
|-------|---------|-------|
| error | type I  | 0.093 |
|       | type II | 0.043 |

**C**

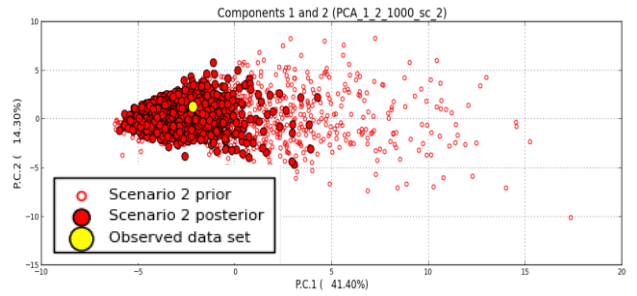

| Outliers |     | total summary stats = 39 |        |     |   |
|----------|-----|--------------------------|--------|-----|---|
| < 0.05   | *   | 0                        | > 0.95 | *   | 1 |
|          | **  | 0                        |        | **  | 0 |
|          | *** | 0                        |        | *** | 0 |

**D**

|    | event                                | mean (95% CI)<br>(x10 <sup>6</sup> generations) | n |
|----|--------------------------------------|-------------------------------------------------|---|
| t2 | divergence of north                  | 3.34 (2.88 - 3.80)                              | 8 |
| t1 | divergence between south and central | 0.46 (0.29 - 0.64)                              | 8 |

**E**

| Parameter   | Prior                                 | Posterior |          |          |          | Measure of performance |           |           |        |        |          |
|-------------|---------------------------------------|-----------|----------|----------|----------|------------------------|-----------|-----------|--------|--------|----------|
|             |                                       | median    | mode     | q050     | q950     | true value             | median    | mode      | RRMISE | RMedAd | Factor 2 |
| N1 (centre) | U [10 <sup>2</sup> ,10 <sup>6</sup> ] | 4.61 e+5  | 3.82 e+5 | 1.15 e+5 | 9.12 e+5 | 4.802 e+5              | 4.36 e+5  | 3.853 e+5 | 1.754  | 0.52   | 0.77     |
| N2 (north)  | U [10 <sup>2</sup> ,10 <sup>6</sup> ] | 7.54 e+5  | 9.13 e+5 | 3.76 e+5 | 9.76 e+5 | 7.344 e+5              | 5.971 e+5 | 6.350 e+5 | 0.507  | 0.309  | 0.876    |
| N3 (south)  | U [10 <sup>2</sup> ,10 <sup>6</sup> ] | 3.95 e+5  | 3.05 e+5 | 8.9 e+4  | 8.69 e+5 | 4.355 e+5              | 4.295 e+5 | 3.800 e+5 | 1.636  | 0.543  | 0.758    |
| t1          | U [10 <sup>2</sup> ,10 <sup>6</sup> ] | 2.99 e+5  | 9.07 e+4 | 4.99 e+4 | 8.63 e+5 | 3.406 e+5              | 3.543 e+5 | 2.651 e+5 | 6.477  | 0.626  | 0.69     |
| t2          | U [10 <sup>2</sup> ,10 <sup>7</sup> ] | 3.20 e+6  | 2.23 e+6 | 1.20 e+6 | 7.16 e+6 | 3.44 e+6               | 3.672 e+6 | 3.182 e+6 | 1.053  | 0.44   | 0.854    |
| μ-seq       | standard                              | 1.74 e-8  | 1.38 e-8 | 1.10 e-8 | 3.54 e-8 | 1.989 e-8              | 1.924 e-8 | 1.572 e-8 | 0.663  | 0.287  | 0.946    |
| K-seq       | standard                              | 3.62 e+0  | 6.50 e-2 | 8.96 e-2 | 4.16 e+1 | 1.115 e+1              | 2.181 e+0 | 5.551 e-2 | 57.29  | 0.944  | 0.196    |
