# Supplementary material for: Islands within an island: Population genetic structure of the endemic Sardinian newt, Euproctus platycephalus
Source: PubMed Central journal article supplement (PMC5306002; doi:10.1002/ece3.2665), 2017-01-25
Supplement: ECE3-7-1190-s002.pdf [file ECE3-7-1190-s002.pdf]

**Figure S2**

**A**

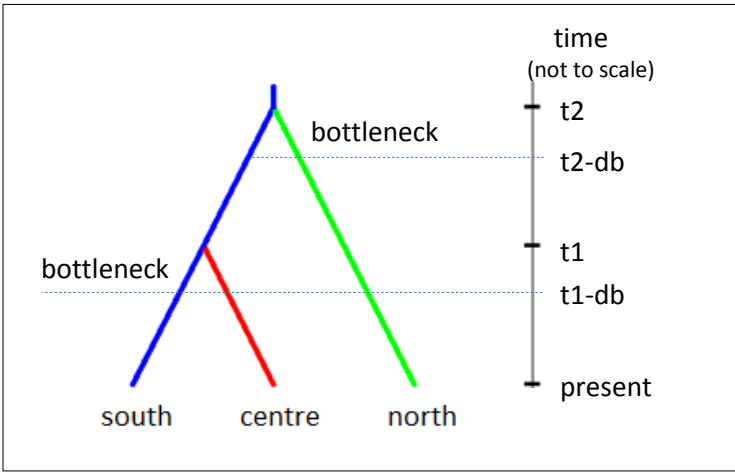

**B**

| time      | event                                 | population affected    | outliers (total stats=39) |    |     |        |    |     |
|-----------|---------------------------------------|------------------------|---------------------------|----|-----|--------|----|-----|
|           |                                       |                        | < 0.05                    |    |     | > 0.95 |    |     |
|           |                                       |                        | *                         | ** | *** | *      | ** | *** |
| <b>t2</b> | divergence of north from centre-south | north                  | 0                         | 0  | 0   | 2      | 0  | 0   |
|           |                                       | centre-south           | 0                         | 0  | 0   | 1      | 0  | 0   |
|           |                                       | north and centre-south | 0                         | 0  | 0   | 1      | 0  | 0   |
| <b>t1</b> | divergence of south and central       | centre                 | 0                         | 0  | 0   | 1      | 0  | 0   |
|           |                                       | south                  | 0                         | 0  | 0   | 1      | 0  | 0   |
|           |                                       | centre and south       | 0                         | 0  | 0   | 2      | 0  | 0   |

**C**

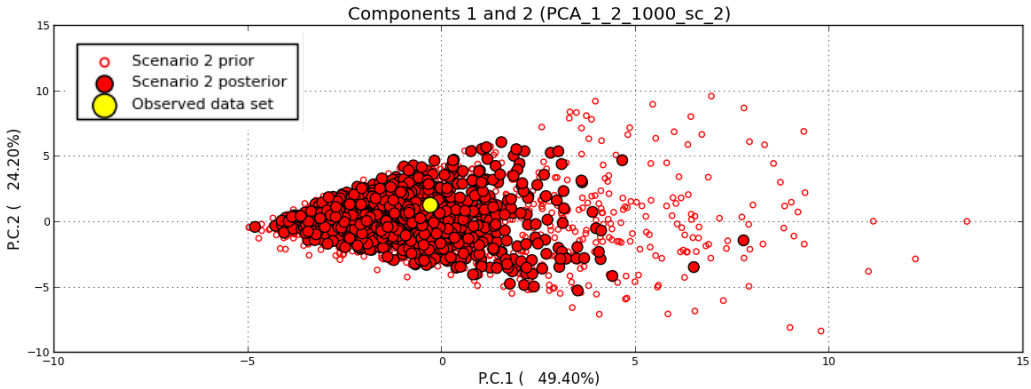

**D**

| population    | time (x10 <sup>6</sup> ) |       | n | prior<br>U[10 <sup>3</sup> ,10 <sup>7</sup> ] | Bottleneck<br>Wilcoxon test<br>W=11<br>P value=0.4857 |
|---------------|--------------------------|-------|---|-----------------------------------------------|-------------------------------------------------------|
|               | mean                     | se    |   |                                               |                                                       |
| north         | 6.16                     | 0.17  | 4 |                                               |                                                       |
| south-central | 5.75                     | 0.481 | 4 |                                               |                                                       |

**E**

| population    | time (x10 <sup>6</sup> ) |      | n | prior<br>U[10 <sup>3</sup> ,10 <sup>7</sup> ] | Expansion<br>Wilcoxon test<br>W=3<br>P value=0.7 |
|---------------|--------------------------|------|---|-----------------------------------------------|--------------------------------------------------|
|               | mean                     | se   |   |                                               |                                                  |
| north         | 2.10                     | 0.12 | 3 |                                               |                                                  |
| south-central | 2.21                     | 0.09 | 3 |                                               |                                                  |
