# Supplementary material for: Islands within an island: Population genetic structure of the endemic Sardinian newt, Euproctus platycephalus
Source: PubMed Central journal article supplement (PMC5306002; doi:10.1002/ece3.2665), 2017-01-25
Supplement: ECE3-7-1190-s003.pdf [file ECE3-7-1190-s003.pdf]

A

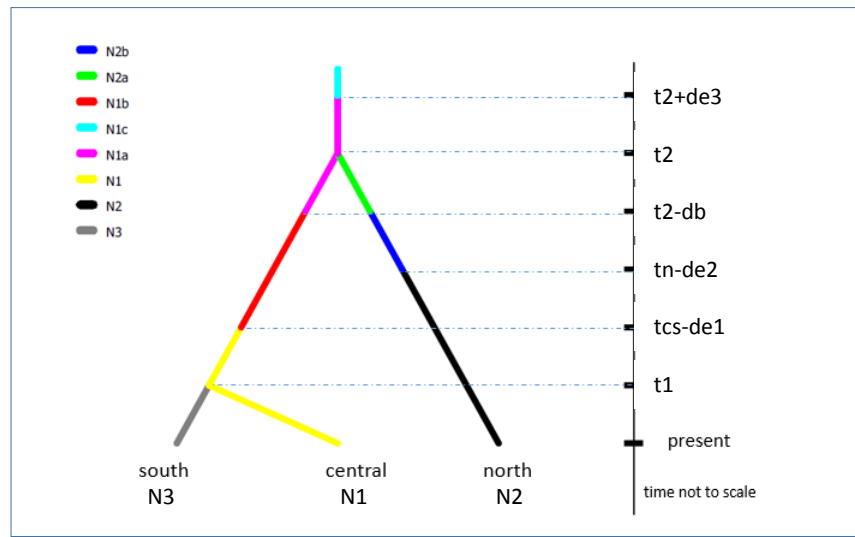

B

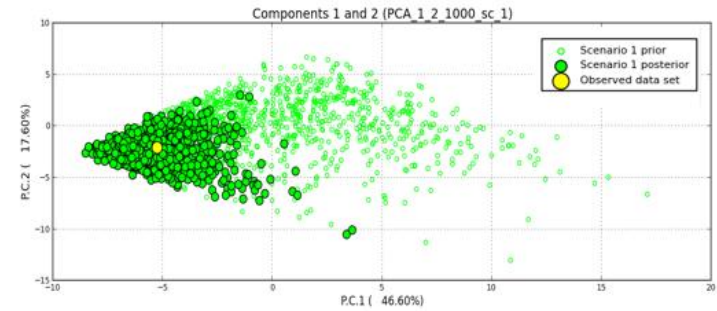

| Outliers |     | total summary statistics = 39 |        |     |   |
|----------|-----|-------------------------------|--------|-----|---|
| < 0.05   | *   | 0                             | > 0.95 | *   | 0 |
|          | **  | 0                             |        | **  | 0 |
|          | *** | 0                             |        | *** | 0 |

C

|                           | parameter | type | prior                                         | posterior |           |           |          | measure of performance |           |           |        |        |          |
|---------------------------|-----------|------|-----------------------------------------------|-----------|-----------|-----------|----------|------------------------|-----------|-----------|--------|--------|----------|
|                           |           |      |                                               | median    | mode      | q050      | q950     | true value             | median    | mode      | RRMISE | RMedAd | Factor 2 |
| <b>Ne centre</b>          | N1        | N    | U [10 <sup>3</sup> ,10 <sup>6</sup> ]         | 5.57 e+5  | 4.54 e+5  | 1.70 e+5  | 9.42 e+5 | 5.362 e+5              | 4.507 e+5 | 4.015 e+5 | 3.063  | 0.457  | 0.822    |
| <b>Ne north</b>           | N2        | N    | U [10 <sup>3</sup> ,10 <sup>7</sup> ]         | 1.08 e+6  | 8.47 e+5  | 4.29 e+5  | 2.93 e+6 | 1.371 e+6              | 1.384 e+6 | 1.084 e+6 | 1.126  | 0.482  | 0.784    |
| <b>Ne south</b>           | N3        | N    | U [10 <sup>3</sup> ,10 <sup>6</sup> ]         | 5.27 e+5  | 4.75 e+5  | 1.58 e+5  | 9.46 e+5 | 5.515 e+5              | 4.871 e+5 | 4.631 e+5 | 1.06   | 0.456  | 0.862    |
| <b>split centre/south</b> | t1        | T    | U [10 <sup>3</sup> ,6x10 <sup>5</sup> ]       | 2.70 e+5  | 1.63 e+05 | 6.10 e+4  | 5.56 e+5 | 2.835 e+5              | 2.745 e+5 | 2.472 e+5 | 2.32   | 0.528  | 0.806    |
| <b>split north/ cs</b>    | t2        | T    | 4 x10 <sup>6</sup> fixed                      |           |           |           |          |                        |           |           |        |        |          |
| <b>expansion cs</b>       | tcs       | T    | U [6.2x10 <sup>5</sup> ,3.8x10 <sup>6</sup> ] | 2.27 e+6  | 2.32 e+6  | 4.81 e+5  | 3.62 e+6 | 2.231 e+6              | 2.207 e+6 | 2.316 e+6 | 0.813  | 0.377  | 0.9      |
|                           | de1       | T    | U [10 ,10 <sup>3</sup> ]                      | 4.53 e+2  | 4.89 e+1  | 4.89 e+1  | 9.48 e+2 | 4.783 e+2              | 5.035 e+2 | 4.789 e+2 | 5.027  | 0.542  | 0.706    |
|                           | N1b       | N    | U [10 <sup>6</sup> ,10 <sup>9</sup> ]         | 4.87 e+8  | 1.56 e+8  | 4.81 e+7  | 9.60 e+8 | 5.011 e+8              | 4.960 e+8 | 4.84 e+8  | 7.525  | 0.519  | 0.738    |
| <b>expansion north</b>    | tn        | T    | U [6.2x10 <sup>5</sup> ,3.8x10 <sup>6</sup> ] | 2.17 e+6  | 1.13 e+6  | 8.12 e+05 | 3.60 e+6 | 2.253 e+6              | 2.251 e+6 | 2.404 e+6 | 0.816  | 0.371  | 0.884    |
|                           | de2       | T    | U [10,10 <sup>4</sup> ]                       | 4.81 e+3  | 8.08 e+2  | 4.70 e+2  | 9.58 e+3 | 5.075 e+3              | 4.980 e+3 | 4.789 e+3 | 7.047  | 0.533  | 0.7      |
|                           | N2b       | N    | U [10 <sup>6</sup> ,10 <sup>9</sup> ]         | 4.34 e+8  | 2.14 e+7  | 4.11 e+7  | 9.49 e+8 | 4.621 e+8              | 4.954 e+8 | 4.516 e+8 | 18.251 | 0.594  | 0.644    |
| <b>early bottleneck</b>   | db        | T    | U [10,10 <sup>3</sup> ]                       | 4.81 e+2  | 3.84 e+2  | 5.40 e+1  | 9.47 e+2 | 4.778 e+2              | 5.061 e+2 | 5.088 e+2 | 6.904  | 0.556  | 0.692    |
|                           | N1a       | N    | U [10,10 <sup>2</sup> ]                       | 5.90 e+1  | 9.24 e+1  | 1.56 e+1  | 9.63 e+1 | 5.839 e+1              | 5.400 e+1 | 5.010 e+1 | 1.244  | 0.447  | 0.826    |
|                           | N2a       | N    | U [10, 5x10 <sup>2</sup> ]                    | 2.28 e+2  | 8.03 e+1  | 2.90 e+1  | 4.69 e+2 | 2.305 e+2              | 2.590 e+2 | 2.739 e+2 | 3.853  | 0.573  | 0.698    |
| <b>pre-split north/cs</b> | de3       | T    | U [10,10 <sup>3</sup> ]                       | 5.16 e+2  | 6.83 e+1  | 6.89 e+1  | 9.54 e+2 | 5.328 e+2              | 5.132 e+2 | 5.542 e+2 | 3.305  | 0.494  | 0.71     |
|                           | N1c       | N    | U [10 <sup>6</sup> ,10 <sup>9</sup> ]         | 4.84 e+8  | 2.12 e+8  | 4.46 e+7  | 9.49 e+8 | 4.481 e+8              | 4.990 e+8 | 4.869 e+8 | 16.108 | 0.584  | 0.654    |
| <b>mutation model</b>     | μseq      | M    | standard                                      | 1.43 e-8  | 1.22 e-8  | 1.06 e-8  | 2.38 e-8 | 1.523 e-8              | 1.751 e-8 | 1.535 e-8 | 0.576  | 0.228  | 0.968    |
|                           | K1seq     | M    | standard                                      | 2.75 e+0  | 5.49 e-2  | 7.98 e-2  | 3.92 e+1 | 1.058 e+1              | 2.905 e+0 | 2.602 e-1 | 67.493 | 0.947  | 0.22     |
