# Supplementary material for: Islands within an island: Population genetic structure of the endemic Sardinian newt, Euproctus platycephalus
Source: PubMed Central journal article supplement (PMC5306002; doi:10.1002/ece3.2665), 2017-01-25
Supplement: ECE3-7-1190-s004.pdf [file ECE3-7-1190-s004.pdf]

A

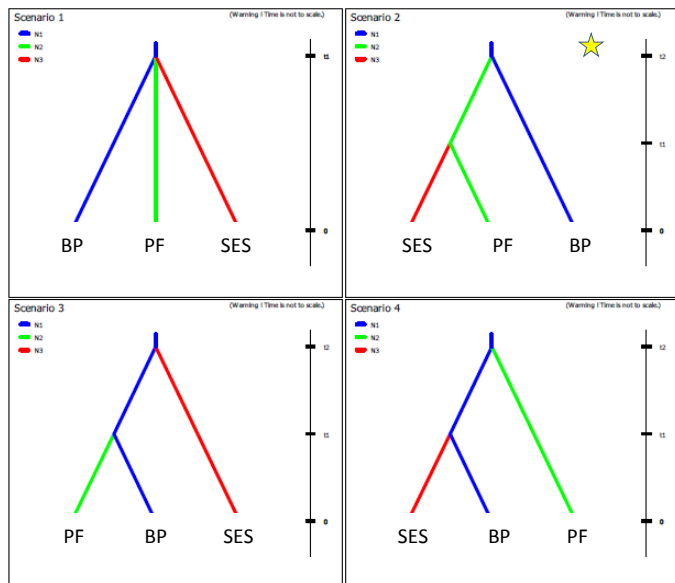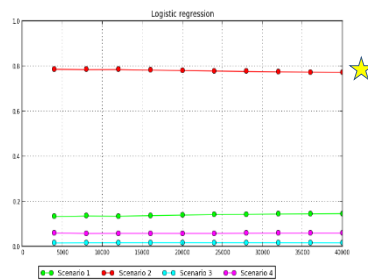

confidence in scenario choice

|       |         |       |
|-------|---------|-------|
| error | type I  | 0.296 |
|       | type II | 0.232 |

B

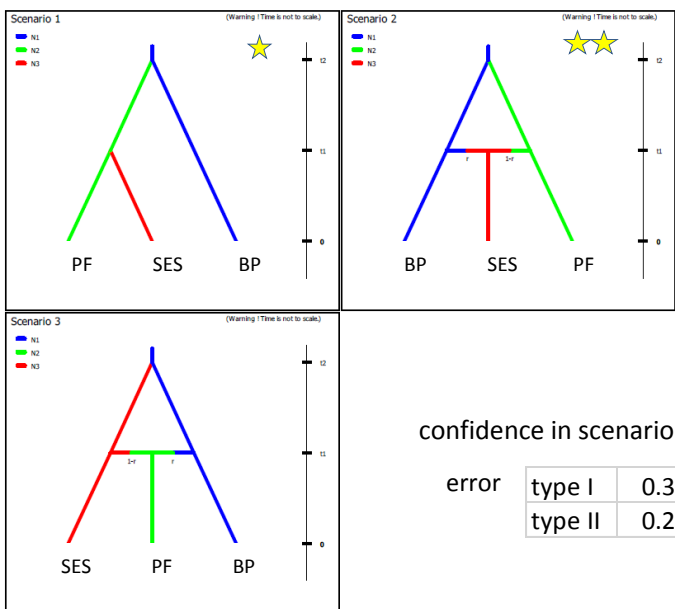

| admixture |     |       |
|-----------|-----|-------|
| BP:SES    | r   | 0.189 |
| PF:SES    | 1-r | 0.811 |

confidence in scenario choice

|       |         |       |
|-------|---------|-------|
| error | type I  | 0.318 |
|       | type II | 0.294 |

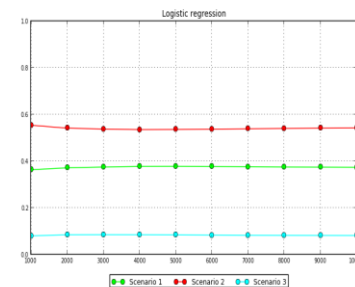

C

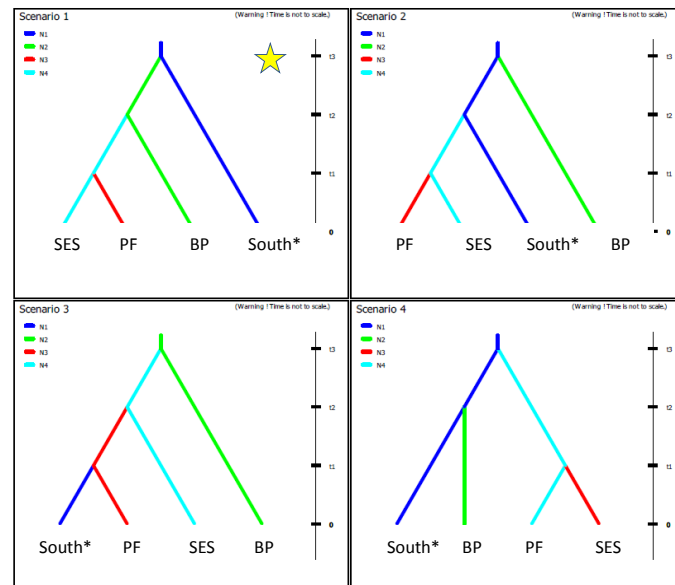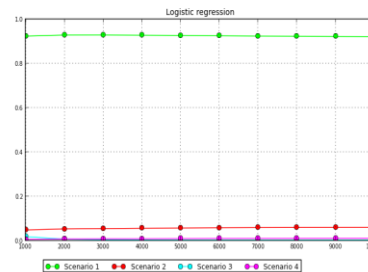

confidence in scenario choice

|       |         |       |
|-------|---------|-------|
| error | type I  | 0.388 |
|       | type II | 0.16  |

D

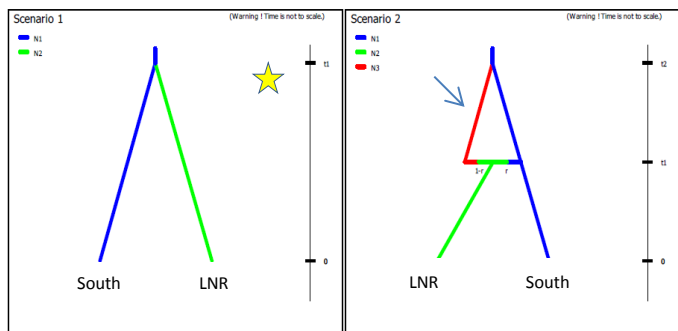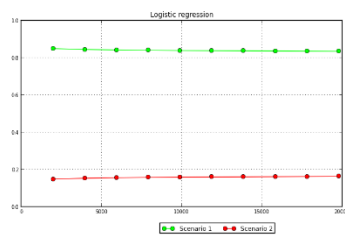

confidence in scenario choice

|       |         |       |
|-------|---------|-------|
| error | type I  | 0.176 |
|       | type II | 0.331 |

E

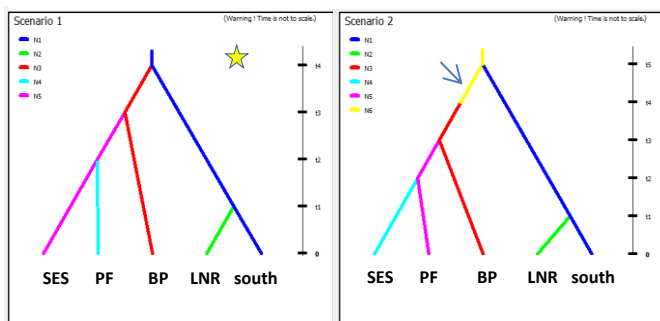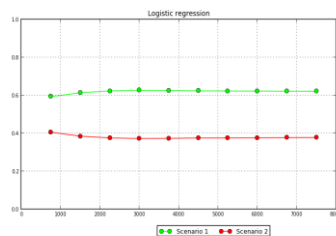

confidence in scenario choice

|       |         |       |
|-------|---------|-------|
| error | type I  | 0.412 |
|       | type II | 0.359 |
