# Supplementary material for: Islands within an island: Population genetic structure of the endemic Sardinian newt, Euproctus platycephalus
Source: PubMed Central journal article supplement (PMC5306002; doi:10.1002/ece3.2665), 2017-01-25
Supplement: ECE3-7-1190-s005.pdf [file ECE3-7-1190-s005.pdf]

Figure S5

A

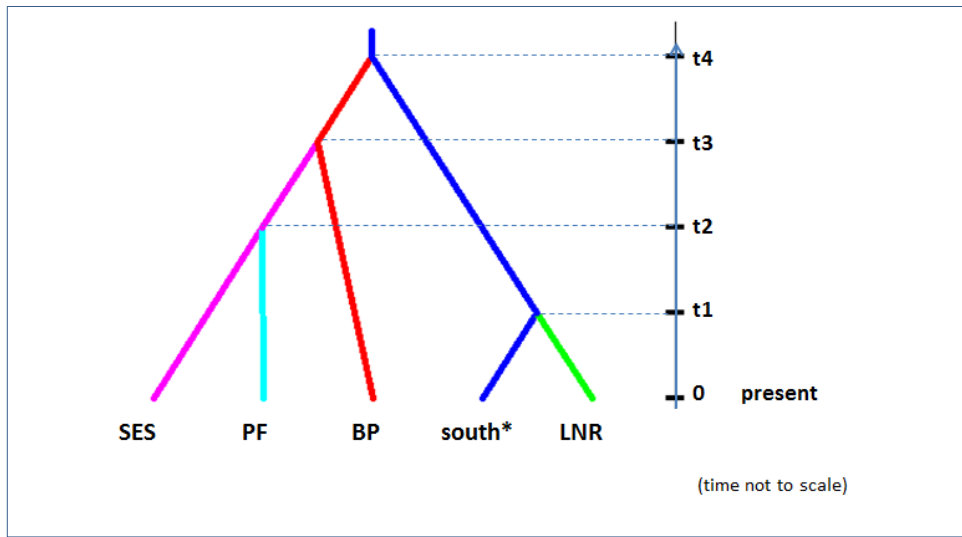

B

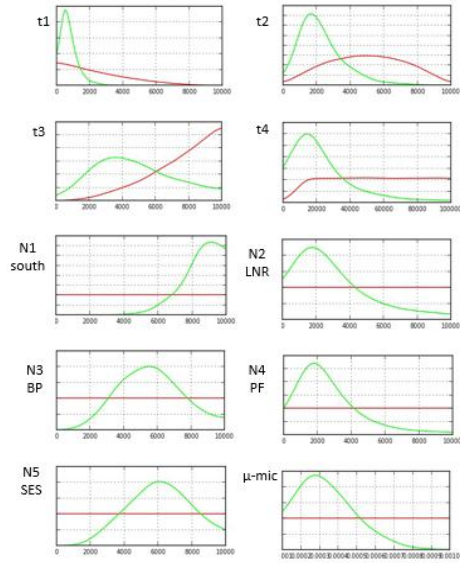

C

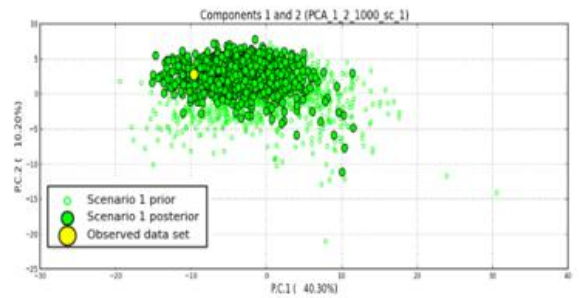

| Outliers |     | total summary stats = 100 |        |     |   |
|----------|-----|---------------------------|--------|-----|---|
| < 0.05   | *   | 15                        | > 0.95 | *   | 5 |
|          | **  | 0                         |        | **  | 0 |
|          | *** | 0                         |        | *** | 0 |

D

| parameter  | type | Prior                   | Posterior |          |          |          | Measure of performance |           |           |         |         |          |
|------------|------|-------------------------|-----------|----------|----------|----------|------------------------|-----------|-----------|---------|---------|----------|
|            |      |                         | median    | mode     | q050     | q950     | true value             | Median    | mode      | RRMIS E | RMedA d | Factor 2 |
| N1 (south) | N    | U [10,10 <sup>4</sup> ] | 8.41 e+3  | 8.86 e+3 | 5.74 e+3 | 9.82 e+3 | 8.161 e+3              | 7.901 e+3 | 8.214 e+3 | 0.287   | 0.151   | 0.994    |
| N2 (LNR)   | N    | U [10,10 <sup>4</sup> ] | 2.34 e+3  | 1.52 e+3 | 7.66 e+2 | 7.12 e+3 | 3.012 e+3              | 4.068 e+3 | 3.782 e+3 | 1.475   | 0.475   | 0.78     |
| N3 (BP)    | N    | U [10,10 <sup>4</sup> ] | 4.79 e+3  | 4.33 e+3 | 2.19 e+3 | 8.51 e+3 | 5.074 e+3              | 5.185 e+3 | 5.065 e+3 | 0.529   | 0.281   | 0.972    |
| N4 (PF)    | N    | U [10,10 <sup>4</sup> ] | 2.33 e+3  | 1.54 e+3 | 7.37 e+2 | 7.10 e+3 | 2.994 e+3              | 3.290 e+3 | 2.915 e+3 | 1.093   | 0.409   | 0.892    |
| N5 (SES)   | N    | U [10,10 <sup>4</sup> ] | 7.06 e+3  | 7.58 e+3 | 3.94 e+3 | 9.43 e+3 | 6.943 e+3              | 6.948 e+3 | 7.093 e+3 | 0.393   | 0.216   | 0.988    |
| t1         | T    | U [10,10 <sup>4</sup> ] | 8.47 e+2  | 4.99 e+2 | 2.77 e+2 | 3.55 e+3 | 1.196 e+3              | 1.806 e+3 | 1.254 e+3 | 3.241   | 0.6     | 0.664    |
| t2         | T    | U [10,10 <sup>4</sup> ] | 1.57 e+3  | 1.45 e+3 | 5.12 e+2 | 4.08 e+3 | 1.801 e+3              | 2.046 e+3 | 1.543 e+3 | 1.471   | 0.489   | 0.766    |
| t3         | T    | U [10,10 <sup>4</sup> ] | 4.38 e+3  | 2.95 e+3 | 1.61 e+3 | 8.64 e+3 | 4.677 e+3              | 5.364 e+3 | 4.958 e+3 | 0.902   | 0.432   | 0.9      |
| t4         | T    | U [10,10 <sup>5</sup> ] | 1.38 e+4  | 9.19 e+3 | 4.26 e+3 | 6.20 e+4 | 2.081 e+4              | 2.723 e+4 | 2.114 e+4 | 2.011   | 0.565   | 0.728    |
| μmic       | M    | standard                | 3.23 e-4  | 2.57 e-4 | 1.49 e-4 | 6.17 e-4 | 3.542 e-4              | 4.321 e-4 | 3.954 e-4 | 0.808   | 0.354   | 0.892    |
| pmic       | M    | standard                | 2.39 e-1  | 3.00 e-1 | 1.34 e-1 | 3.00 e-1 | 2.285 e-1              | 1.900 e-1 | 1.795 e-1 | 0.352   | 0.245   | 0.994    |
| snimic     | M    | standard                | 2.67 e-7  | 1.28 e-8 | 1.50 e-8 | 3.47 e-6 | 8.003 e-7              | 4.094 e-7 | 9.313 e-8 | 31.889  | 0.896   | 0.34     |
