# Supplementary material for: Islands within an island: Population genetic structure of the endemic Sardinian newt, Euproctus platycephalus
Source: PubMed Central journal article supplement (PMC5306002; doi:10.1002/ece3.2665), 2017-01-25
Supplement: ECE3-7-1190-s006.pdf [file ECE3-7-1190-s006.pdf]

Figure S6

A

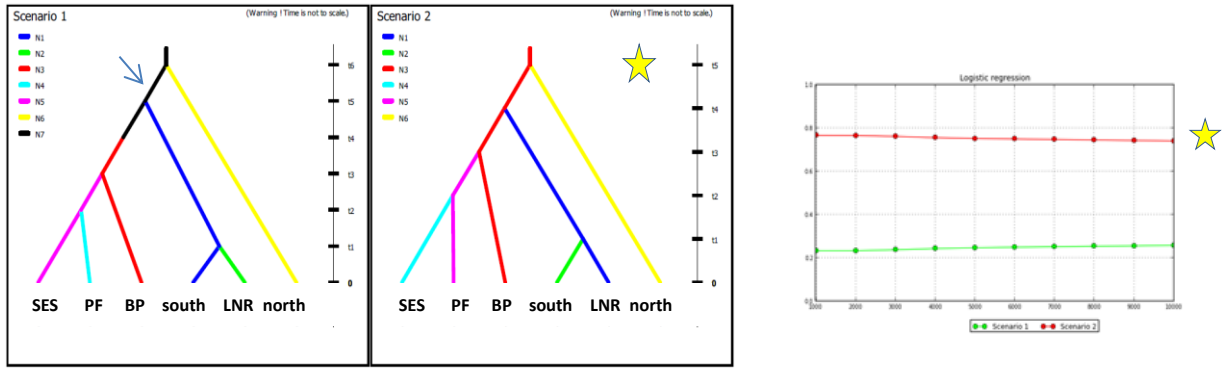

B

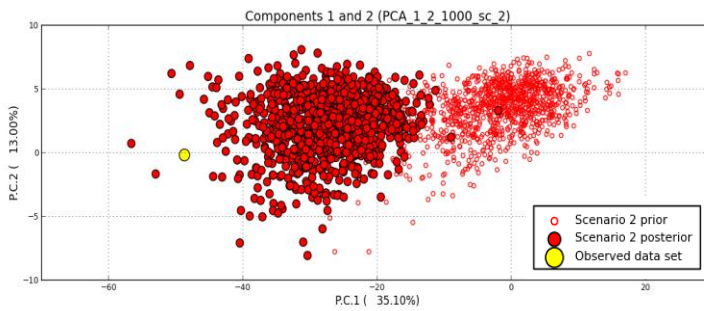

| outliers |     | total summary stats = 144 |        |     |    |
|----------|-----|---------------------------|--------|-----|----|
| < 0.05   | *   | 26                        | > 0.95 | *   | 15 |
|          | **  | 17                        |        | **  | 13 |
|          | *** | 3                         |        | *** | 0  |

C

| time       | event                          | supported scenario posterior | south/central scenarios mean (95% CI)                 | n  |
|------------|--------------------------------|------------------------------|-------------------------------------------------------|----|
| t1         | split LNR from south           | $3.96 \times 10^3$           | $0.93 \times 10^3$ (0.41 - $1.44 \times 10^3$ )       | 5  |
| t2         | split PF from SES              | $3.44 \times 10^3$           | $1.48 \times 10^3$ (1.16 - $1.79 \times 10^3$ )       | 8  |
| t3         | split SES/PF from BP           | $6.09 \times 10^3$           | $3.91 \times 10^3$ (2.77 - $5.06 \times 10^3$ )       | 8  |
| t4         | split central from south       | $5.82 \times 10^4$           | $1.70 \times 10^4$ (1.43 - $1.96 \times 10^3$ )       | 4  |
| t5         | split north from central/south | $1.29 \times 10^4$           | NA                                                    | NA |
| $\mu$ -mic |                                | $1.85 \times 10^{-4}$        | $3.16 \times 10^{-4}$ (3.02 - $3.31 \times 10^{-4}$ ) | 16 |

D

| $\mu$ -mic $\times 10^{-4}$ | n  | median | mean | range       | sd    |
|-----------------------------|----|--------|------|-------------|-------|
| south/central               | 16 | 3.22   | 3.16 | 2.29 - 3.49 | 0.268 |
| north alone                 | 5  | 3.52   | 3.78 | 2.99 - 3.79 | 0.392 |
| north/south/central         | 7  | 1.32   | 1.36 | 1.13 - 1.85 | 0.189 |

| comparison of mean $\mu$ -mic        | W    | p-value |
|--------------------------------------|------|---------|
| south/central vs north alone         | 29.5 | 0.409   |
| south/central vs north/south/central | 112  | 0.00021 |
| north alone vs north/south/central   | 35   | 0.0025  |
