# Supplementary material for: Islands within an island: Population genetic structure of the endemic Sardinian newt, Euproctus platycephalus
Source: PubMed Central journal article supplement (PMC5306002; doi:10.1002/ece3.2665), 2017-01-25
Supplement: ECE3-7-1190-s007.pdf [file ECE3-7-1190-s007.pdf]

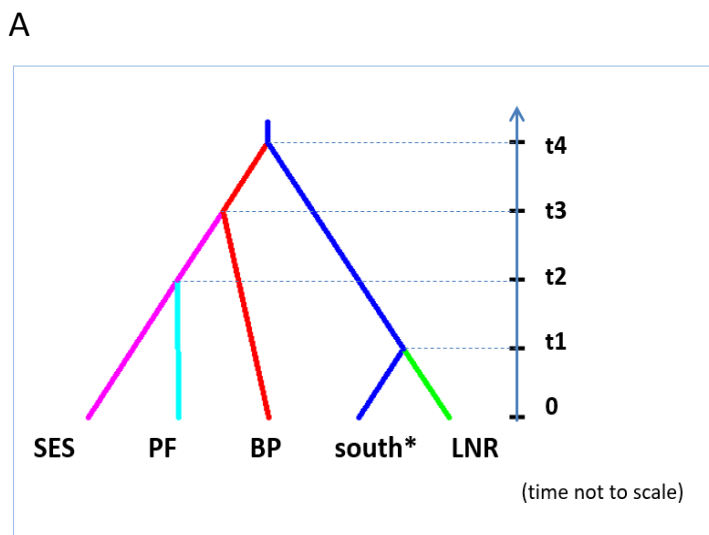

B

| population | n  | mean x10 <sup>3</sup> | 95% CI x10 <sup>3</sup> |
|------------|----|-----------------------|-------------------------|
| south      | 11 | 7.960                 | 7.240-8.680             |
| LNR        | 11 | 3.204                 | 2.333-4.075             |
| BP         | 14 | 5.068                 | 4.512-5.624             |
| PF         | 14 | 2.363                 | 2.057-2.669             |
| SES        | 14 | 5.799                 | 5.051-6.548             |
| north      | 5  | 5.226                 | 3.170-7.290             |

C

| time | event                                                                                       | population | bottleneck              | stable                  |
|------|---------------------------------------------------------------------------------------------|------------|-------------------------|-------------------------|
| t4   | ancestral split; south from centre<br>1.70 x 10 <sup>4</sup> (1.43-1.96 x 10 <sup>4</sup> ) | centre     | 0.6161 [0.5663, 0.6359] | 0.3839 [0.3641, 0.4037] |
|      |                                                                                             | south/LNR  | 0.7240 [0.6976, 0.7503] | 0.2760 [0.2497, 0.3024] |
| t3   | within centre split 1<br>3.91 x10 <sup>3</sup> (2.77-5.06 x 10 <sup>3</sup> )               | BP         | 0.2658 [0.2323, 0.2993] | 0.7342 [0.7007, 0.7677] |
|      |                                                                                             | SES/PF     | 0.3270 [0.2904, 0.3639] | 0.6730 [0.6363, 0.7096] |
| t2   | within centre split 2<br>1.47 x10 <sup>3</sup> (1.16-1.79 x10 <sup>3</sup> )                | SES        | 0.2678 [0.2393, 0.2963] | 0.7322 [0.7037, 0.7607] |
|      |                                                                                             | PF         | 0.2716 [0.2571, 0.2862] | 0.7285 [0.7138, 0.7429] |
| t1   | within south split<br>0.92 x10 <sup>3</sup> (0.41-1.44 x10 <sup>3</sup> )                   | south      | 0.2101 [0.1845, 0.2357] | 0.7899 [0.7643, 0.8155] |
|      |                                                                                             | LNR        | 0.1159 [0.1079, 0.1239] | 0.8841 [0.8761, 0.8921] |

D

|        | bottleneck              | stable                  |
|--------|-------------------------|-------------------------|
| north  | 0.6988 [0.6641, 0.7336] | 0.3012 [0.2664, 0.3359] |
| centre | 0.5014 [0.4879, 0.5150] | 0.4986 [0.4850, 0.5121] |
| south  | 0.6553 [0.6410, 0.6696] | 0.3447 [0.3304, 0.3590] |
|        | expansion               | stable                  |
| north  | 0.3507 [0.2796, 0.4218] | 0.6493 [0.5782, 0.7204] |
| centre | 0.5087 [0.4798, 0.5375] | 0.4913 [0.4625, 0.5202] |
| south  | 0.5435 [0.5122, 0.5741] | 0.4565 [0.4253, 0.4878] |

E

| scenario   | parameter | priors                                | north                                                               | central                                                              | south                                                                |
|------------|-----------|---------------------------------------|---------------------------------------------------------------------|----------------------------------------------------------------------|----------------------------------------------------------------------|
| bottleneck | t-bn      | U [10 <sup>3</sup> ,10 <sup>5</sup> ] | 4.31 x10 <sup>3</sup> (1.19x10 <sup>3</sup> ,4.43x10 <sup>4</sup> ) | 4.69 x10 <sup>4</sup> (6.28x10 <sup>3</sup> , 9.39x10 <sup>4</sup> ) | 1.71 x10 <sup>4</sup> (1.76x10 <sup>3</sup> , 7.95x10 <sup>4</sup> ) |
|            | db        | U [10,10 <sup>3</sup> ]               | 5.07 x10 <sup>2</sup> (5.99x10 <sup>1</sup> ,9.52x10 <sup>2</sup> ) | 4.99 x10 <sup>2</sup> (3.31x10 <sup>1</sup> ,9.48x10 <sup>2</sup> )  | 4.60 x10 <sup>2</sup> (5.40x10 <sup>1</sup> ,9.28x10 <sup>2</sup> )  |
|            | Ne bn     | U [10,10 <sup>2</sup> ]               | 5.22x10 <sup>1</sup> (1.40x10 <sup>1</sup> ,9.51x10 <sup>1</sup> )  | 5.44x10 <sup>1</sup> (1.41x10 <sup>1</sup> ,9.55x10 <sup>1</sup> )   | 5.73x10 <sup>1</sup> (1.47x10 <sup>1</sup> ,9.55x10 <sup>1</sup> )   |
| expansion  | t-exp     | U [10 <sup>3</sup> ,10 <sup>6</sup> ] | 4.23x10 <sup>5</sup> (4.44x10 <sup>4</sup> ,9.49x10 <sup>5</sup> )  | 4.81x10 <sup>5</sup> (5.28x10 <sup>4</sup> ,9.23x10 <sup>5</sup> )   | 5.57x10 <sup>5</sup> (9.71x10 <sup>4</sup> ,9.59x10 <sup>5</sup> )   |
|            | de        | U [10,10 <sup>4</sup> ]               | 5.18 x10 <sup>3</sup> (5.99x10 <sup>2</sup> ,9.46x10 <sup>3</sup> ) | 4.82 x10 <sup>3</sup> (5.99x10 <sup>2</sup> ,9.51x10 <sup>3</sup> )  | 5.64 x10 <sup>3</sup> (4.57x10 <sup>2</sup> ,9.58x10 <sup>3</sup> )  |
|            | Ne exp    | U [10 <sup>4</sup> ,10 <sup>8</sup> ] | 4.47x10 <sup>7</sup> (4.60x10 <sup>6</sup> ,9.33x10 <sup>7</sup> )  | 4.41x10 <sup>7</sup> (3.59x10 <sup>6</sup> ,9.50x10 <sup>7</sup> )   | 4.63x10 <sup>7</sup> (4.72x10 <sup>6</sup> ,9.49x10 <sup>7</sup> )   |
